# Supplementary material for: Molecular design towards efficient light-emitting copper(i) halide mononuclear hybrids
Source: Royal Society of Chemistry journal article supplement (doi:10.1039/d3ma00904a), 2023-11-29
Supplement: d3ma00904a1.pdf [file d3ma00904a1.pdf]

## Supporting Information

### Molecular design towards efficient light-emitting copper(I) halide mononuclear hybrids

Yi Lv<sup>[a]</sup>, Jing Yang<sup>[a]</sup>, Haibo Li<sup>[a]</sup>, Wei Liu<sup>\*[a]</sup> and Gangfeng Ouyang<sup>\*[a]</sup>

[a] School of Chemical Engineering and Technology, Sun Yat-sen University, Zhuhai 519082,  
Guangdong, P. R. China

E-mail: liuwei96@mail.sysu.edu.cn, cesoygf@mail.sysu.edu.cn

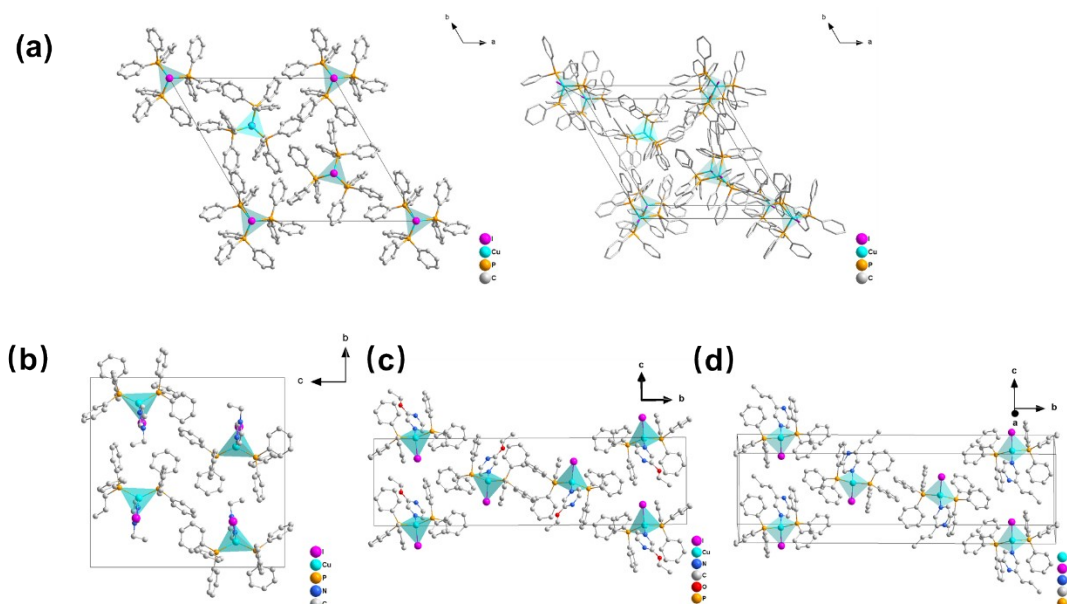

Figure S1. Single-crystal structure of  $\text{CuI}(\text{PPh}_3)_3$  (a) and compound **1-3** (b) (c) (d) .

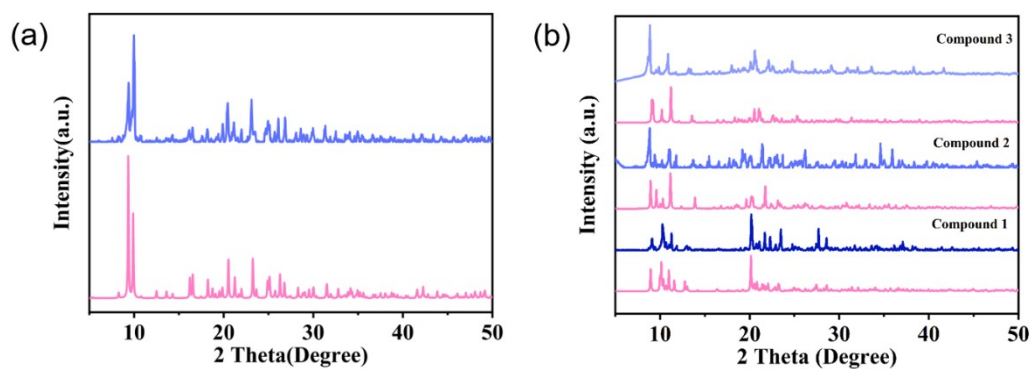

Figure S2. PXRD patterns of simulated (pink lines) and as-made (blue lines) of precursor  $\text{CuI}(\text{PPh}_3)_3$  (a) and compounds **1-3** (b).

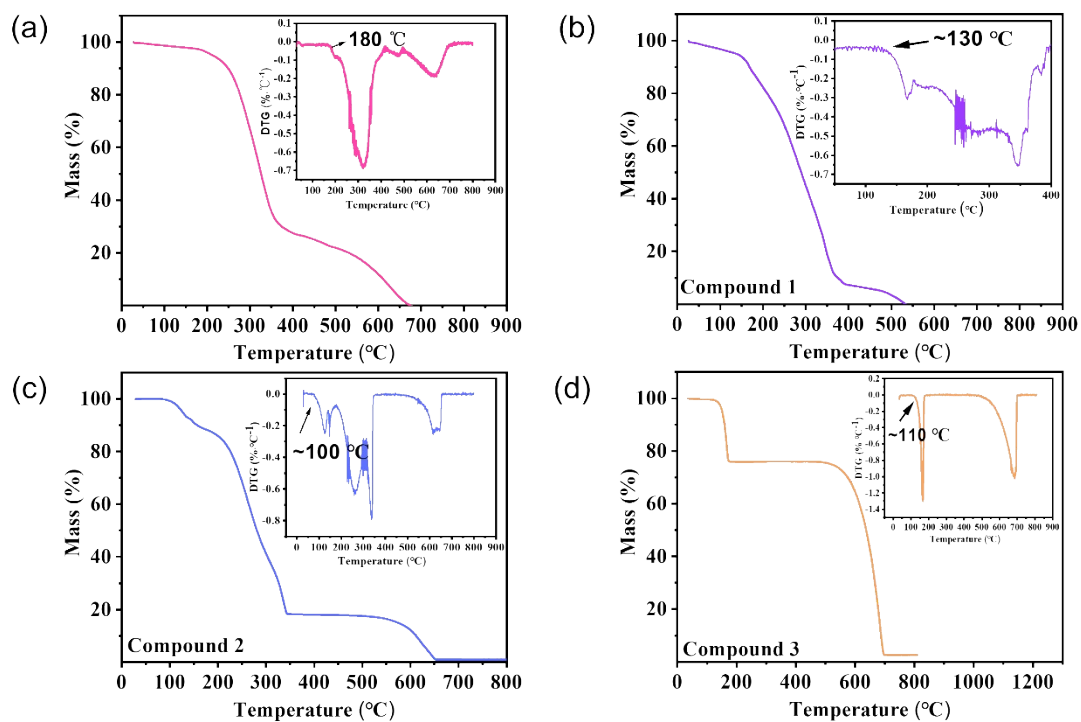

Figure S3. Thermogravimetric analysis curve of  $\text{CuI}(\text{PPh}_3)_3$  (a) and compound 1-3 (b) (c) (d), respectively.

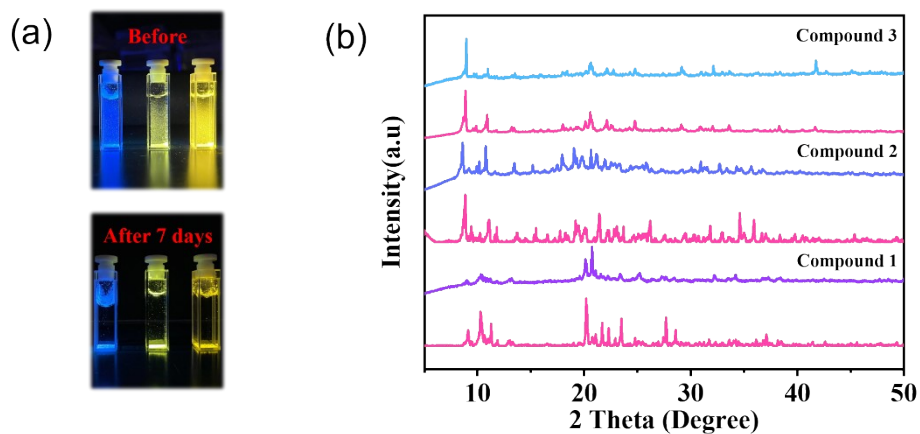

Figure S4. (a) Image of compound 1 and 3 before and after soaking in water. (b) PXRD pattern of compound 1-3 before (pink line) and after (blue lines) soaking.

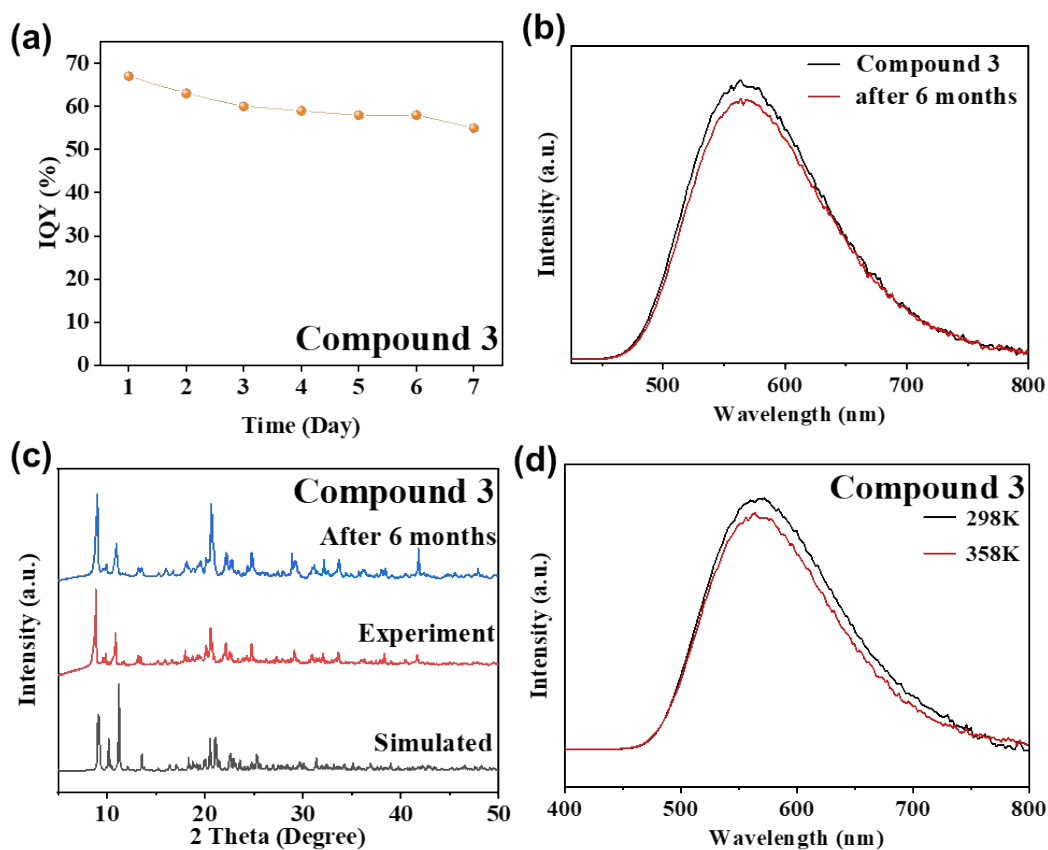

Figure S5. (a) The IQY of the sample compound **3** under UV irradiation. (b) The emission spectra of the fresh-made sample compound **3** and sample stored for 6 months. (c) The PXRD patterns of fresh-made sample and sample compound **3** stored for 6 months. (d) The emission spectra of fresh-made sample compound **3** and sample stored for 6 months

Table S1. The quantum efficiency and stability of reported copper halide hybrids with pyridine and pyrazine derivatives

| Compound                                  | $\lambda_{em}$ [nm] | IQY [%] | Decomposition temperature [°C] |
|-------------------------------------------|---------------------|---------|--------------------------------|
| 0D-CuBr(3-pc) <sub>3</sub> <sup>[1]</sup> | 535                 | 98      | Room temperature               |
| 1D-CuI(4-pc) <sup>[2]</sup>               | 433                 | 35.8    | 100                            |
| 1D-CuI(3,5-dm-py) <sup>[2]</sup>          | 490                 | 35.3    | 100                            |
| 1D-CuI(2,6-dm-pz) <sup>[2]</sup>          | 525                 | 15.4    | 90                             |
| 2D-CuI(pz) <sub>0.5</sub> <sup>[3]</sup>  | 12.7                | 12.7    | 170                            |
| 2D-CuI(bpe) <sub>0.5</sub> <sup>[3]</sup> | 695                 | 1.0     | 300                            |

Reference:

[1] C. Xu, L. Lu, L. Lv, Y. Li, F. Lin, Y. Yang, F. Lin, C. Luo, D. Luo and W. Liu, *Molecular Crystals and Liquid Crystals* **2020**, 709, 54-60.

[2] X. Zhang, W. Liu, G. Z. Wei, D. Banerjee, Z. Hu and J. Li, *Journal of the American Chemical Society* **2014**, *136*, 14230-14236.

[3] W. Ki, X. Hei, H. T. Yi, W. Liu, S. J. Teat, M. Li, Y. Fang, V. Podzorov, E. Garfunkel and J. Li, *Chemistry of Materials* **2021**, *33*, 5317-5325.
